# Supplementary material
Source: publisher site journal article supplement (https://www.dovepress.com/article/398816)
Supplement: Supplementary file 1 [file get_supplementary_file.php]

# Supplementary appendix

**Supplementary table 1** Patients’ use of COPD medications during the baseline and follow-up period

|  | **Baseline period** | | | **Follow-up period** | | |
| --- | --- | --- | --- | --- | --- | --- |
| **COPD medication use (agents)** | **Moderate or severe COPD exacerbation** | **Severe COPD exacerbationa** | **Moderate COPD exacerbationb** | **Moderate or severe COPD exacerbation** | **Severe COPD exacerbationa** | **Moderate COPD exacerbationb** |
| N=307,727 | n=125,942 | n=181,785 | N=307,727 | n=125,942 | n=181,785 |
| ICS/LABA | 68,839 (22.4) | 20,440 (16.2) | 48,399 (26.6) | 87,850 (28.5) | 26,627 (21.1) | 61,223 (33.7) |
| Fluticasone/salmeterol | 28,072 (9.1) | 8538 (6.8) | 19,534 (10.7) | 32,980 (10.7) | 9931 (7.9) | 23,049 (12.7) |
| Budesonide/formoterol | 27,961 (9.1) | 8264 (6.6) | 19,697 (10.8) | 38,301 (12.4) | 11,432 (9.1) | 26,869 (14.8) |
| Fluticasone/vilanterol | 14,236 (4.6) | 4175 (3.3) | 10,061 (5.5) | 21,265 (6.9) | 6737 (5.3) | 14,528 (8.0) |
| Mometasone/formoterol | 1590 (0.5) | 440 (0.3) | 1150 (0.6) | 2382 (0.8) | 815 (0.6) | 1567 (0.9) |
| LAMA | 34,793 (11.3) | 10,995 (8.7) | 23,798 (13.1) | 44,343 (14.4) | 14,750 (11.7) | 29,593 (16.3) |
| Tiotropium | 30,700 (10.0) | 9847 (7.8) | 20,853 (11.5) | 38,461 (12.5) | 12,839 (10.2) | 25,622 (14.1) |
| Umeclidinium | 3980 (1.3) | 1179 (0.9) | 2801 (1.5) | 6235 (2.0) | 2111 (1.7) | 4124 (2.3) |
| Aclidinium | 632 (0.2) | 137 (0.1) | 495 (0.3) | 569 (0.2) | 119 (0.1) | 450 (0.2) |
| Glycopyrrolate | 64 (<0.1) | 22 (<0.1) | 42 (<0.1) | 293 (0.1) | 110 (0.1) | 183 (0.1) |
| Revefenacin | 23 (<0.1) | 12 (<0.1) | 11 (<0.1) | 301 (0.1) | 110 (0.1) | 191 (0.1) |
| Leukotriene modifiers | 31,468 (10.2) | 7698 (6.1) | 23,770 (13.1) | 41,777 (13.6) | 9988 (7.9) | 31,789 (17.5) |
| Montelukast sodium | 31,228 (10.1) | 7638 (6.1) | 23,590 (13.0) | 41,563 (13.5) | 9938 (7.9) | 31,625 (17.4) |
| Zafirlukast | 258 (0.1) | 68 (0.1) | 190 (0.1) | 268 (0.1) | 65 (0.1) | 203 (0.1) |
| Zileuton | 26 (<0.1) | 2 (<0.1) | 24 (<0.1) | 28 (<0.1) | 3 (<0.1) | 25 (<0.1) |
| MITTc | 20,846 (6.8) | 6506 (5.2) | 14,340 (7.9) | 29,832 (9.7) | 9823 (7.8) | 20,009 (11.0) |
| LAMA/LABA | 14,466 (4.7) | 4110 (3.3) | 10,356 (5.7) | 22,991 (7.5) | 6684 (5.3) | 16,307 (9.0) |
| Umeclidinium/vilanterol | 9837 (3.2) | 2815 (2.2) | 7022 (3.9) | 15,573 (5.1) | 4573 (3.6) | 11,000 (6.1) |
| Tiotropium/olodaterol | 3623 (1.2) | 1052 (0.8) | 2571 (1.4) | 5932 (1.9) | 1724 (1.4) | 4208 (2.3) |
| Glycopyrrolate/formoterol | 1321 (0.4) | 324 (0.3) | 997 (0.5) | 2443 (0.8) | 652 (0.5) | 1791 (1.0) |
| Glycopyrrolate/indacaterol | 31 (<0.1) | 6 (<0.1) | 25 (<0.1) | 31 (<0.1) | 11 (<0.1) | 20 (<0.1) |
| ICS | 12,520 (4.1) | 4159 (3.3) | 8361 (4.6) | 21,041 (6.8) | 7405 (5.9) | 13,636 (7.5) |
| Fluticasone | 7274 (2.4) | 2030 (1.6) | 5244 (2.9) | 9654 (3.1) | 2399 (1.9) | 7255 (4.0) |
| Budesonide | 4147 (1.3) | 1947 (1.5) | 2200 (1.2) | 10,700 (3.5) | 4982 (4.0) | 5718 (3.1) |
| Beclomethasone | 977 (0.3) | 214 (0.2) | 763 (0.4) | 1012 (0.3) | 199 (0.2) | 813 (0.4) |
| Mometasone | 434 (0.1) | 84 (0.1) | 350 (0.2) | 528 (0.2) | 118 (0.1) | 410 (0.2) |
| Ciclesonide | 70 (<0.1) | 2 (<0.1) | 68 (<0.1) | 83 (<0.1) | 5 (<0.1) | 78 (<0.1) |
| Flunisolide | 7 (<0.1) | 2 (<0.1) | 5 (<0.1) | 4 (<0.1) | 0 (0.0) | 4 (<0.1) |
| FF/UMEC/VI | 3357 (1.1) | 941 (0.7) | 2416 (1.3) | 17,536 (5.7) | 4721 (3.7) | 12,815 (7.0) |
| LABA | 1748 (0.6) | 728 (0.6) | 1020 (0.6) | 3397 (1.1) | 1561 (1.2) | 1836 (1.0) |
| Arformoterol | 750 (0.2) | 367 (0.3) | 383 (0.2) | 1633 (0.5) | 869 (0.7) | 764 (0.4) |
| Salmeterol | 551 (0.2) | 179 (0.1) | 372 (0.2) | 680 (0.2) | 230 (0.2) | 450 (0.2) |
| Formoterol | 433 (0.1) | 184 (0.1) | 249 (0.1) | 1225 (0.4) | 552 (0.4) | 673 (0.4) |
| Olodaterol | 45 (<0.1) | 13 (<0.1) | 32 (<0.1) | 60 (<0.1) | 18 (<0.1) | 42 (<0.1) |
| Indacaterol | 22 (<0.1) | 6 (<0.1) | 16 (<0.1) | 17 (<0.1) | 3 (<0.1) | 14 (<0.1) |
| Methylxanthines | 1801 (0.6) | 565 (0.4) | 1236 (0.7) | 2154 (0.7) | 673 (0.5) | 1481 (0.8) |
| Theophylline | 1801 (0.6) | 565 (0.4) | 1236 (0.7) | 2154 (0.7) | 673 (0.5) | 1481 (0.8) |
| PDE-4 inhibitors | 1022 (0.3) | 283 (0.2) | 739 (0.4) | 2139 (0.7) | 651 (0.5) | 1488 (0.8) |
| Roflumilast | 1022 (0.3) | 283 (0.2) | 739 (0.4) | 2139 (0.7) | 651 (0.5) | 1488 (0.8) |
| Biologics | 141 (<0.1) | 53 (<0.1) | 88 (<0.1) | 492 (0.2) | 112 (0.1) | 380 (0.2) |
| Mepolizumab | 90 (<0.1) | 33 (<0.1) | 57 (<0.1) | 223 (0.1) | 57 (<0.1) | 166 (0.1) |
| Benralizumab | 35 (<0.1) | 18 (<0.1) | 17 (<0.1) | 253 (0.1) | 52 (<0.1) | 201 (0.1) |
| Reslizumab | 18 (<0.1) | 4 (<0.1) | 14 (<0.1) | 16 (<0.1) | 3 (<0.1) | 13 (<0.1) |
| Dupilumab | 1 (<0.1) | 0 (0.0) | 1 (<0.1) | 24 (<0.1) | 3 (<0.1) | 21 (<0.1) |

**Notes:** aSevere COPD exacerbation defined as an inpatient stay with a diagnosis code for COPD exacerbation in the primary position.

bModerate COPD exacerbation defined as an outpatient or emergency room visit with a primary diagnosis of COPD exacerbation and at least one dispensing/administration of a systemic corticosteroid or guideline-recommended antibiotic within 5 days before or after the visit.

cMITT refers to ≥1 overlapping days of supply with the following three controller medications: ICS, LABA, and LAMA.

**Abbreviations:** COPD, chronic obstructive pulmonary disease; FF/UMEC/VI, fluticasone furoate/umeclidinium/vilanterol; ICS, inhaled corticosteroid; LABA, long-acting β2-agonist; LAMA, long-acting muscarinic agonist; MITT, multiple-inhaler triple therapy; PDE-4, phosphodiesterase-4.

**Supplementary table 2** Treatment patterns 90 days pre- and post-COPD exacerbation

| **Treatment patterns (classes)** | **Moderate or severe COPD exacerbation** | **Severe COPD exacerbationa** | **Moderate COPD exacerbationb** |
| --- | --- | --- | --- |
|
| Patients with ICS, LABA, or LAMA (including combinations) as latest baseline medication, n | 84,615 | 25,623 | 58,992 |
| Switch from latest medicationc, n (%) | 11,899 (14.1) | 4207 (16.4) | 7692 (13.0) |
| ICS/LABA | 4119 (4.9) | 1460 (5.7) | 2659 (4.5) |
| ICS/LABA → ICS/LABA/LAMA | 2458 (2.9) | 824 (3.2) | 1634 (2.8) |
| ICS/LABA → LAMA | 974 (1.2) | 373 (1.5) | 601 (1.0) |
| ICS/LABA → LABA/LAMA | 357 (0.4) | 120 (0.5) | 237 (0.4) |
| ICS/LABA → ICS | 275 (0.3) | 115 (0.4) | 160 (0.3) |
| ICS/LABA → LABA | 38 (0.0) | 20 (0.1) | 18 (0.0) |
| ICS/LABA → ICS+LAMA | 17 (0.0) | 8 (0.0) | 9 (0.0) |
| LAMA | 3481 (4.1) | 1194 (4.7) | 2287 (3.9) |
| LAMA → ICS/LABA/LAMA | 1950 (2.3) | 639 (2.5) | 1311 (2.2) |
| LAMA → ICS/LABA | 872 (1.0) | 332 (1.3) | 540 (0.9) |
| LAMA → LABA/LAMA | 319 (0.4) | 91 (0.4) | 228 (0.4) |
| LAMA → ICS+LAMA | 179 (0.2) | 65 (0.3) | 114 (0.2) |
| LAMA → ICS | 138 (0.2) | 57 (0.2) | 81 (0.1) |
| LAMA → LABA | 23 (0.0) | 10 (0.0) | 13 (0.0) |
| ICS/LABA/LAMA | 1937 (2.3) | 696 (2.7) | 1241 (2.1) |
| ICS/LABA/LAMA → ICS/LABA | 899 (1.1) | 313 (1.2) | 586 (1.0) |
| ICS/LABA/LAMA → LAMA | 752 (0.9) | 281 (1.1) | 471 (0.8) |
| ICS/LABA/LAMA → LABA/LAMA | 195 (0.2) | 64 (0.2) | 131 (0.2) |
| ICS/LABA/LAMA → ICS | 61 (0.1) | 26 (0.1) | 35 (0.1) |
| ICS/LABA/LAMA → ICS+LAMA | 27 (0.0) | 12 (0.0) | 15 (0.0) |
| ICS/LABA/LAMA → LABA | 3 (0.0) | 0 (0.0) | 3 (0.0) |
| ICS | 973 (1.1) | 383 (1.5) | 590 (1.0) |
| ICS → ICS/LABA | 478 (0.6) | 168 (0.7) | 310 (0.5) |
| ICS → ICS/LABA/LAMA | 162 (0.2) | 71 (0.3) | 91 (0.2) |
| ICS → ICS+LAMA | 82 (0.1) | 37 (0.1) | 45 (0.1) |
| ICS → LAMA | 110 (0.1) | 51 (0.2) | 59 (0.1) |
| ICS → LABA/LAMA | 112 (0.1) | 39 (0.2) | 73 (0.1) |
| ICS → LABA | 29 (0.0) | 17 (0.1) | 12 (0.0) |
| LABA/LAMA | 1104 (1.3) | 368 (1.4) | 736 (1.2) |
| LABA/LAMA → ICS/LABA/LAMA | 621 (0.7) | 179 (0.7) | 442 (0.7) |
| LABA/LAMA → ICS/LABA | 274 (0.3) | 100 (0.4) | 174 (0.3) |
| LABA/LAMA → ICS | 114 (0.1) | 47 (0.2) | 67 (0.1) |
| LABA/LAMA → LAMA | 84 (0.1) | 37 (0.1) | 47 (0.1) |
| LABA/LAMA → LABA | 9 (0.0) | 4 (0.0) | 5 (0.0) |
| LABA/LAMA → ICS+LAMA | 2 (0.0) | 1 (0.0) | 1 (0.0) |
| LABA | 137 (0.2) | 57 (0.2) | 80 (0.1) |
| LABA → ICS/LABA | 75 (0.1) | 30 (0.1) | 45 (0.1) |
| LABA → LABA/LAMA | 27 (0.0) | 10 (0.0) | 17 (0.0) |
| LABA → ICS | 19 (0.0) | 9 (0.0) | 10 (0.0) |
| LABA → LAMA | 11 (0.0) | 5 (0.0) | 6 (0.0) |
| LABA → ICS/LABA/LAMA | 5 (0.0) | 3 (0.0) | 2 (0.0) |
| LABA → ICS+LAMA | 0 (0.0) | 0 (0.0) | 0 (0.0) |
| ICS+LAMA | 148 (0.2) | 49 (0.2) | 99 (0.2) |
| ICS+LAMA → ICS/LABA/LAMA | 38 (0.0) | 9 (0.0) | 29 (0.0) |
| ICS+LAMA → LAMA | 57 (0.1) | 21 (0.1) | 36 (0.1) |
| ICS+LAMA → ICS | 34 (0.0) | 13 (0.1) | 21 (0.0) |
| ICS+LAMA → ICS/LABA | 13 (0.0) | 4 (0.0) | 9 (0.0) |
| ICS+LAMA → LABA | 1 (0.0) | 0 (0.0) | 1 (0.0) |
| ICS+LAMA → LABA/LAMA | 5 (0.0) | 2 (0.0) | 3 (0.0) |
| Remain on latest medicationd, n (%) | 54,367 (64.3) | 15,091 (58.9) | 39,276 (66.6) |
| ICS/LABA | 26,751 (31.6) | 7400 (28.9) | 19,351 (32.8) |
| ICS/LABA/LAMA | 10,092 (11.9) | 2683 (10.5) | 7409 (12.6) |
| LAMA | 7267 (8.6) | 2155 (8.4) | 5112 (8.7) |
| LAMA/LABA | 6635 (7.8) | 1723 (6.7) | 4912 (8.3) |
| ICS | 3093 (3.7) | 966 (3.8) | 2127 (3.6) |
| ICS+LAMA | 287 (0.3) | 73 (0.3) | 214 (0.4) |
| LABA | 242 (0.3) | 91 (0.4) | 151 (0.3) |
| Discontinue latest medication  (45-day gap)e, n (%) | 18,349 (21.7) | 6325 (24.7) | 12,024 (20.4) |
| ICS/LABA | 9878 (11.7) | 3199 (12.5) | 6679 (11.3) |
| LAMA | 2765 (3.3) | 993 (3.9) | 1772 (3.0) |
| LAMA/LABA | 2085 (2.5) | 695 (2.7) | 1390 (2.4) |
| ICS | 1975 (2.3) | 787 (3.1) | 1188 (2.0) |
| ICS/LABA/LAMA | 1462 (1.7) | 563 (2.2) | 899 (1.5) |
| LABA | 127 (0.2) | 62 (0.2) | 65 (0.1) |
| ICS+LAMA | 57 (0.1) | 26 (0.1) | 31 (0.1) |

**Notes:** aSevere COPD exacerbation defined as an inpatient stay with a diagnosis code for COPD exacerbation in the primary position.

bModerate COPD exacerbation defined as an outpatient or emergency room visit with a primary diagnosis of COPD exacerbation and at least one dispensing/administration of a systemic corticosteroid or guideline-recommended antibiotic within 5 days before or after the visit.

cMedication switch was defined as dispensing of different medication classes (ICS, LABA, LAMA, or any combinations) for the latest medication dispensed in the 90 days before the index date (not including the index date) and the first medication dispensed within 90 days after the index date (including the index date).

dPatients remaining on therapy were those with a dispensing of the same medication class (ICS, LABA, LAMA, or any combinations) for the latest medication dispensed in the 90 days before the index date (not including the index date) and the first medication dispensed within 90 days after the index date (including the index date) or dispensing of the first medication beyond the 90-day window after the index date without discontinuation.

eDiscontinuation was defined as a gap >45 days between the end of the days of supply of a dispensing and the start date of the next fill, or between the end of the days of supply of the last dispensing and the end of the observation period.

**Abbreviations:** COPD, chronic obstructive pulmonary disease; ICS, inhaled corticosteroid; LABA, long-acting β2-agonist; LAMA, long-acting muscarinic agonist.

**Supplementary table 3** Treatment patterns 30 days pre- and post-COPD exacerbation (sensitivity analysis)

| **Treatment patterns (classes)** | **Moderate or severe COPD exacerbation** | **Severe COPD exacerbationa** | **Moderate COPD exacerbationb** |
| --- | --- | --- | --- |
|
| Patients with ICS, LABA, or LAMA (including combinations) as latest baseline medication, n | 72,234 | 21,377 | 50,857 |
| Switch from latest medicationc, n (%) | 7117 (9.9) | 2500 (11.7) | 4617 (9.1) |
| ICS/LABA | 2621 (3.6) | 916 (4.3) | 1705 (3.4) |
| ICS/LABA → ICS/LABA/LAMA | 1852 (2.6) | 629 (2.9) | 1223 (2.4) |
| ICS/LABA → LAMA | 497 (0.7) | 183 (0.9) | 314 (0.6) |
| ICS/LABA → LABA/LAMA | 171 (0.2) | 58 (0.3) | 113 (0.2) |
| ICS/LABA → ICS | 74 (0.1) | 33 (0.2) | 41 (0.1) |
| ICS/LABA → LABA | 15 (0.0) | 9 (0.0) | 6 (0.0) |
| ICS/LABA → ICS+LAMA | 12 (0.0) | 4 (0.0) | 8 (0.0) |
| LAMA | 2335 (3.2) | 776 (3.6) | 1559 (3.1) |
| LAMA → ICS/LABA/LAMA | 1485 (2.1) | 474 (2.2) | 1011 (2.0) |
| LAMA → ICS/LABA | 433 (0.6) | 165 (0.8) | 268 (0.5) |
| LAMA → LABA/LAMA | 190 (0.3) | 53 (0.2) | 137 (0.3) |
| LAMA → ICS+LAMA | 144 (0.2) | 52 (0.2) | 92 (0.2) |
| LAMA → ICS | 69 (0.1) | 27 (0.1) | 42 (0.1) |
| LAMA → LABA | 14 (0.0) | 5 (0.0) | 9 (0.0) |
| ICS/LABA/LAMA | 733 (1.0) | 270 (1.3) | 463 (0.9) |
| ICS/LABA/LAMA → ICS/LABA | 336 (0.5) | 124 (0.6) | 212 (0.4) |
| ICS/LABA/LAMA → LAMA | 286 (0.4) | 109 (0.5) | 177 (0.3) |
| ICS/LABA/LAMA → LABA/LAMA | 77 (0.1) | 20 (0.1) | 57 (0.1) |
| ICS/LABA/LAMA → ICS | 17 (0.0) | 8 (0.0) | 9 (0.0) |
| ICS/LABA/LAMA → ICS+LAMA | 15 (0.0) | 9 (0.0) | 6 (0.0) |
| ICS/LABA/LAMA → LABA | 2 (0.0) | 0 (0.0) | 2 (0.0) |
| ICS | 589 (0.8) | 248 (1.2) | 341 (0.7) |
| ICS → ICS/LABA | 292 (0.4) | 112 (0.5) | 180 (0.4) |
| ICS → ICS/LABA/LAMA | 104 (0.1) | 50 (0.2) | 54 (0.1) |
| ICS → ICS+LAMA | 65 (0.1) | 29 (0.1) | 36 (0.1) |
| ICS → LAMA | 57 (0.1) | 26 (0.1) | 31 (0.1) |
| ICS → LABA/LAMA | 56 (0.1) | 23 (0.1) | 33 (0.1) |
| ICS → LABA | 15 (0.0) | 8 (0.0) | 7 (0.0) |
| LABA/LAMA | 662 (0.9) | 227 (1.1) | 435 (0.9) |
| LABA/LAMA → ICS/LABA/LAMA | 438 (0.6) | 127 (0.6) | 311 (0.6) |
| LABA/LAMA → ICS/LABA | 131 (0.2) | 57 (0.3) | 74 (0.1) |
| LABA/LAMA → ICS | 58 (0.1) | 25 (0.1) | 33 (0.1) |
| LABA/LAMA → LAMA | 29 (0.0) | 15 (0.1) | 14 (0.0) |
| LABA/LAMA → LABA | 4 (0.0) | 2 (0.0) | 2 (0.0) |
| LABA/LAMA → ICS+LAMA | 2 (0.0) | 1 (0.0) | 1 (0.0) |
| LABA | 96 (0.1) | 38 (0.2) | 58 (0.1) |
| LABA → ICS/LABA | 60 (0.1) | 24 (0.1) | 36 (0.1) |
| LABA → LABA/LAMA | 19 (0.0) | 5 (0.0) | 14 (0.0) |
| LABA → ICS | 7 (0.0) | 3 (0.0) | 4 (0.0) |
| LABA → LAMA | 7 (0.0) | 4 (0.0) | 3 (0.0) |
| LABA → ICS/LABA/LAMA | 3 (0.0) | 2 (0.0) | 1 (0.0) |
| LABA → ICS+LAMA | 0 (0.0) | 0 (0.0) | 0 (0.0) |
| ICS+LAMA | 81 (0.1) | 25 (0.1) | 56 (0.1) |
| ICS+LAMA → ICS/LABA/LAMA | 31 (0.0) | 6 (0.0) | 25 (0.0) |
| ICS+LAMA → LAMA | 19 (0.0) | 9 (0.0) | 10 (0.0) |
| ICS+LAMA → ICS | 17 (0.0) | 7 (0.0) | 10 (0.0) |
| ICS+LAMA → ICS/LABA | 10 (0.0) | 2 (0.0) | 8 (0.0) |
| ICS+LAMA → LABA | 1 (0.0) | 0 (0.0) | 1 (0.0) |
| ICS+LAMA → LABA/LAMA | 3 (0.0) | 1 (0.0) | 2 (0.0) |
| Remain on latest medicationd, n (%) | 45,858 (63.5) | 12,183 (57.0) | 33,675 (66.2) |
| ICS/LABA | 21,338 (29.5) | 5658 (26.5) | 15,680 (30.8) |
| ICS/LABA/LAMA | 9666 (13.4) | 2510 (11.7) | 7156 (14.1) |
| LAMA | 6304 (8.7) | 1750 (8.2) | 4554 (9.0) |
| LAMA/LABA | 5627 (7.8) | 1371 (6.4) | 4256 (8.4) |
| ICS | 2437 (3.4) | 743 (3.5) | 1694 (3.3) |
| ICS+LAMA | 288 (0.4) | 75 (0.4) | 213 (0.4) |
| LABA | 198 (0.3) | 76 (0.4) | 122 (0.2) |
| Discontinue latest medicatione, n (%) | 19,259 (26.7) | 6694 (31.3) | 12,565 (24.7) |
| ICS/LABA | 9936 (13.8) | 3256 (15.2) | 6680 (13.1) |
| LAMA | 2761 (3.8) | 1017 (4.8) | 1744 (3.4) |
| ICS/LABA/LAMA | 2370 (3.3) | 888 (4.2) | 1482 (2.9) |
| LABA/LAMA | 2109 (2.9) | 688 (3.2) | 1421 (2.8) |
| ICS | 1857 (2.6) | 740 (3.5) | 1117 (2.2) |
| ICS+LAMA | 115 (0.2) | 46 (0.2) | 69 (0.1) |
| LABA | 111 (0.2) | 59 (0.3) | 52 (0.1) |

**Notes:** aSevere COPD exacerbation defined as an inpatient stay with a diagnosis code for COPD exacerbation in the primary position.

bModerate COPD exacerbation defined as an outpatient or emergency room visit with a primary diagnosis of COPD exacerbation and at least one dispensing/administration of a systemic corticosteroid or guideline-recommended antibiotic within 5 days before or after the visit.

cMedication switch was defined as dispensing of different medication classes (ICS, LABA, LAMA, or any combinations) for the latest medication dispensed in the 30 days before the index date (not including the index date) and the first medication dispensed within 30 days after the index date (including the index date).

dPatients remaining on therapy were those with a dispensing of the same medication class (ICS, LABA, LAMA, or any combinations) for the latest medication dispensed in the 30 days before the index date (not including the index date) and the first medication dispensed within 30 days after the index date (including the index date) or dispensing of the first medication beyond the 30-day window after the index date without discontinuation.

eDiscontinuation was defined as a gap >45 days between the end of the days of supply of a dispensing and the start date of the next fill, or between the end of the days of supply of the last dispensing and the end of the observation period.

**Abbreviations:** COPD, chronic obstructive pulmonary disease; ICS, inhaled corticosteroid; LABA, long-acting β2-agonist; LAMA, long-acting muscarinic agonist.
